# Supplementary material for: An investigation of binding ability of ionic surfactants with trifluoperazine dihydrochloride: insights from surface tension, electronic absorption and fluorescence measurements
Source: Royal Society of Chemistry journal article supplement (doi:10.1039/c2ra21020g), 2012-01-01

## ELECTRONIC SUPPLEMENTARY INFORMATION

### **An Investigation of Binding Ability of Ionic Surfactants with Trifluoperazine dihydrochloride: Insights from Surface tension, Electronic absorption and Fluorescence measurements**

**Rabia Sharma and Rakesh Kumar Mahajan\***

**Department of Chemistry, UGC- Centre for Advanced Studies**

**Guru Nanak Dev University, Amritsar-143005, India**

---

\*Corresponding author, Fax: +91 183 2258820

*E-mail address:* [rakesh\\_chem@yahoo.com](mailto:rakesh_chem@yahoo.com) (R.K. Mahajan)

**Fig. S1:** Fluorescence spectra of pure pyrene (1) in the presence of 1.35mM TFP (2) and of pure TFP in aqueous medium (3).

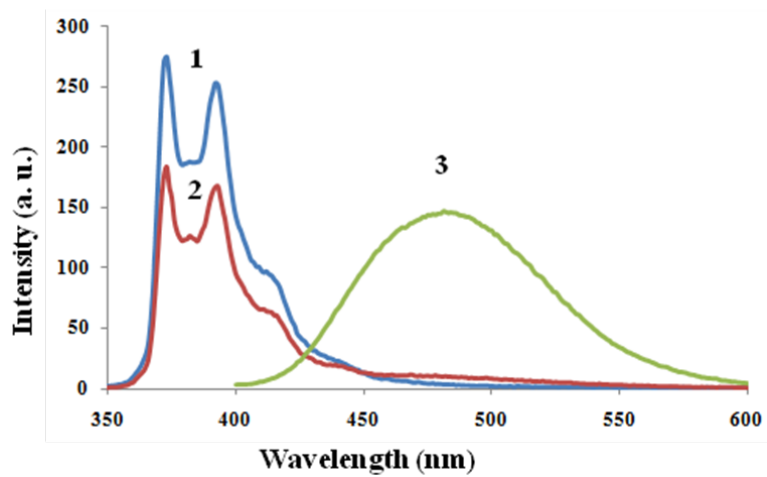

**Fig. S2:** Plots for cmc determination of pure TFP by (a) fluorescence and (b) surface tension ( $\gamma$ ) techniques in water at 25°C.

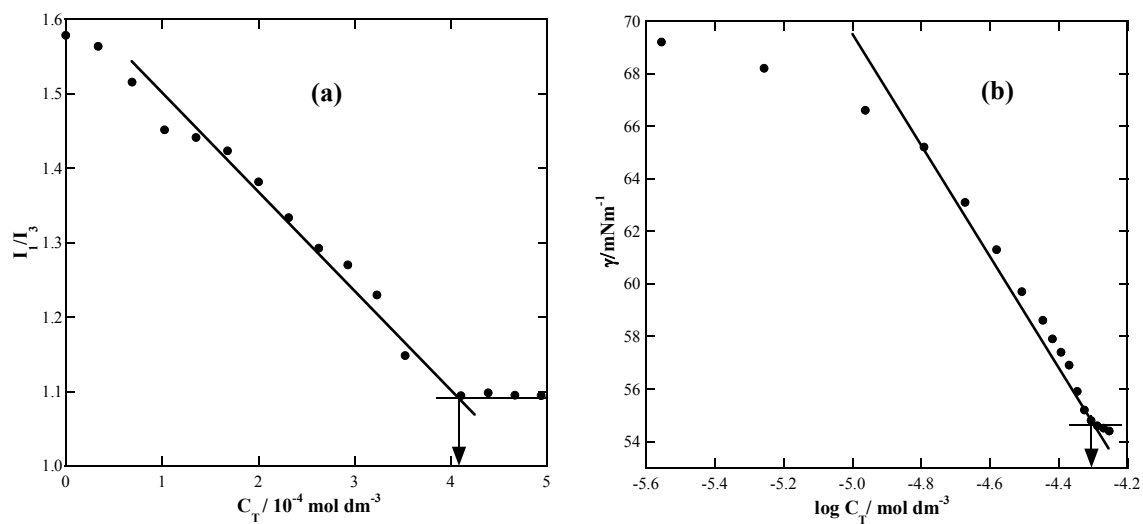

**Fig. S3:** Plots of  $X_1$  determined from regular solution theory (points on solid line) and  $X_{1,ideal}$  Motomura theory (points on dotted line) versus mole fraction of TFP of (a) TFP+ SDS/AOT and (b) TFP+ DTAB/DDAB systems.

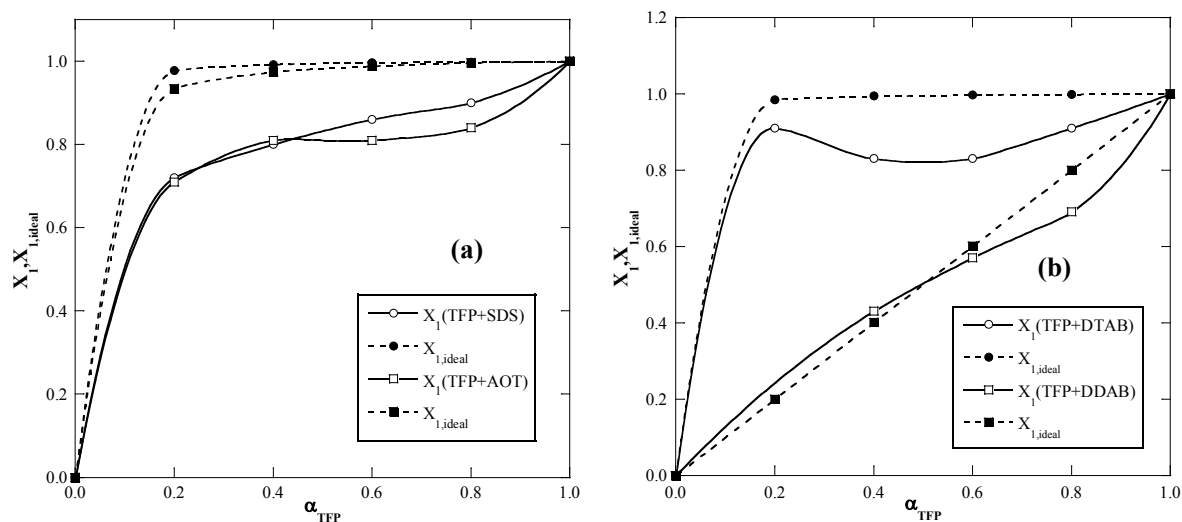

**Fig. S4:** Electronic absorption spectra of pure TFP (1) (304 nm absorbance) in the presence of increasing equivalents of ionic surfactants (a) AOT from (2-5), and (b) DDAB from (2-7).

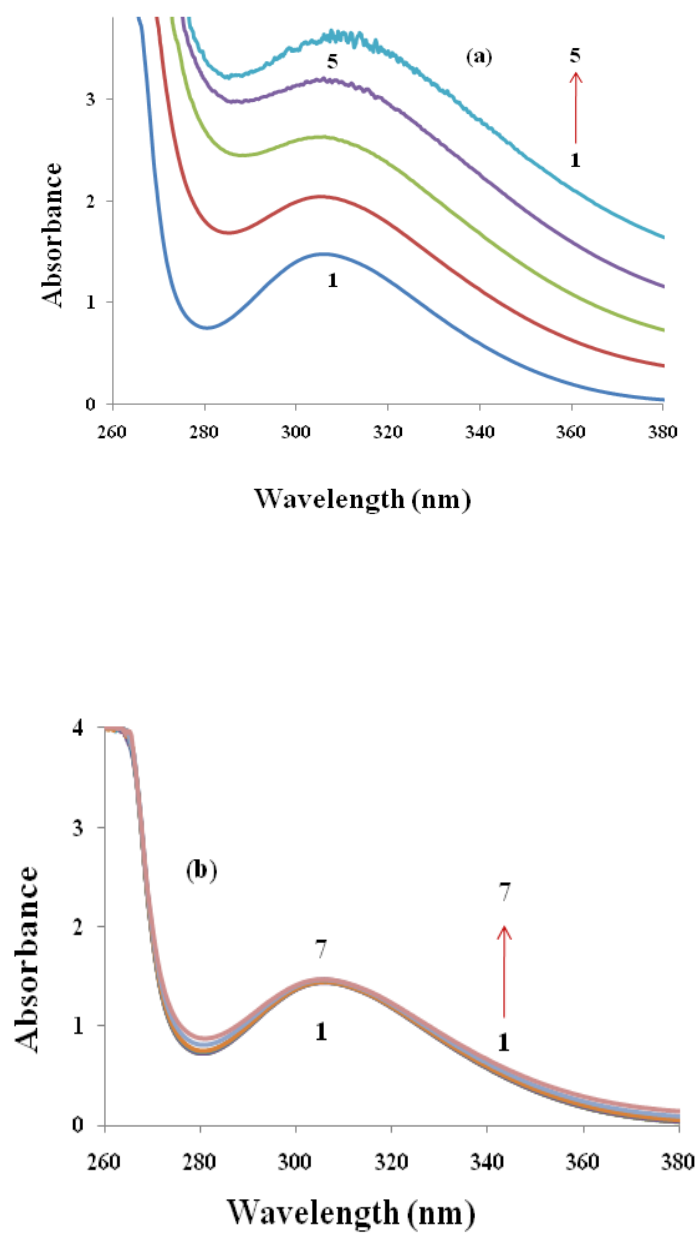

**Fig. S5:** Fluorescence quenching spectra of pure TFP (1) at  $\lambda_{\text{ex}} = 320$  nm in the presence of increasing equivalents of ionic surfactants from (2-6), (a) AOT and (b) DDAB.

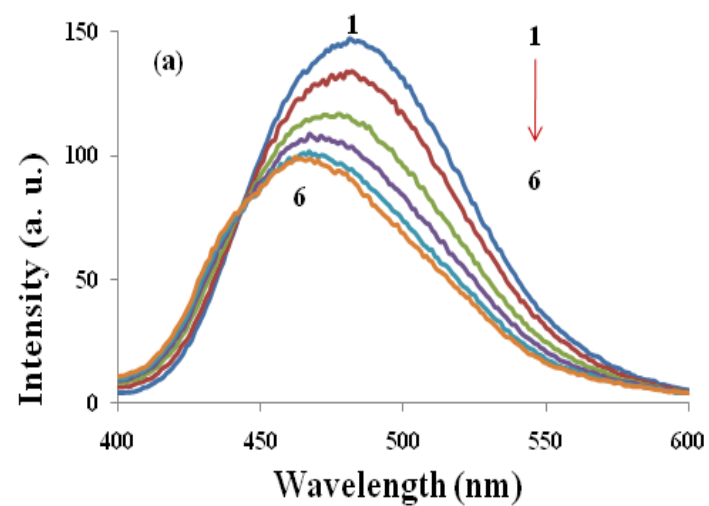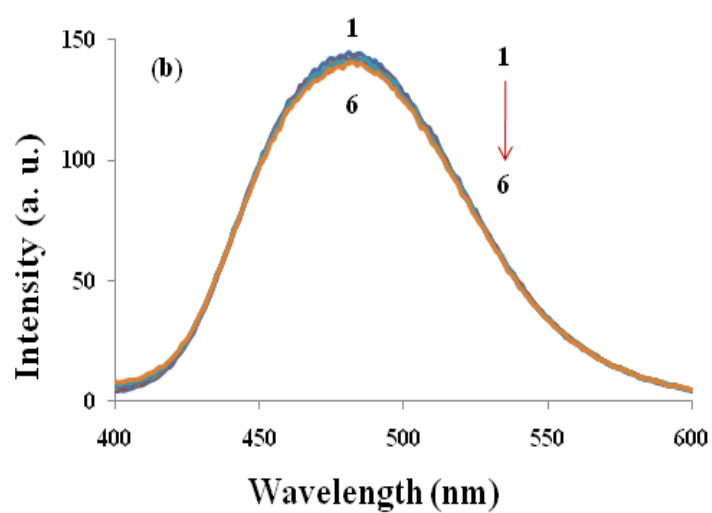

Supplement: c2ra21020g.pdf [file c2ra21020g.pdf]
